# Supplementary material for: An integrated multi-layer 3D-fabrication of PDA/RGD coated graphene loaded PCL nanoscaffold for peripheral nerve restoration
Source: PubMed Central journal article supplement (PMC5778129; doi:10.1038/s41467-017-02598-7), 2018-01-22
Supplement: 41467_2017_2598_MOESM1_ESM.pdf [file 41467_2017_2598_MOESM1_ESM.pdf]

## Supporting Information

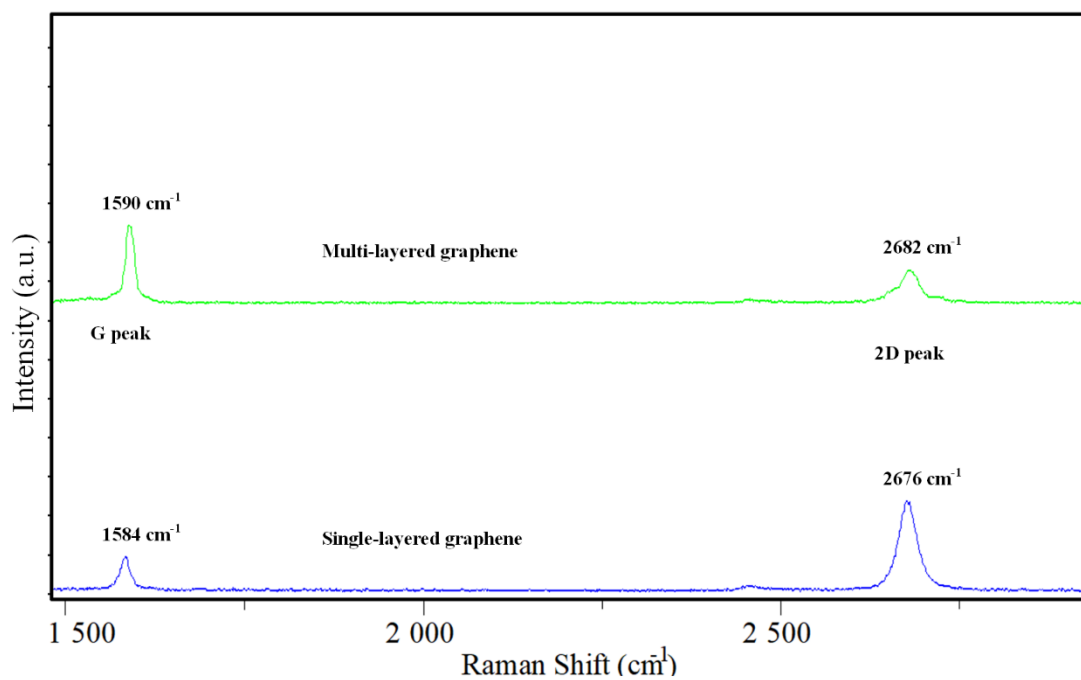

**Supplementary Figure 1. Raman spectrum for single-layered and multi-layered graphene nanoparticles.** The different shape, intensity and position of G peak and 2D peak were displayed from two materials.

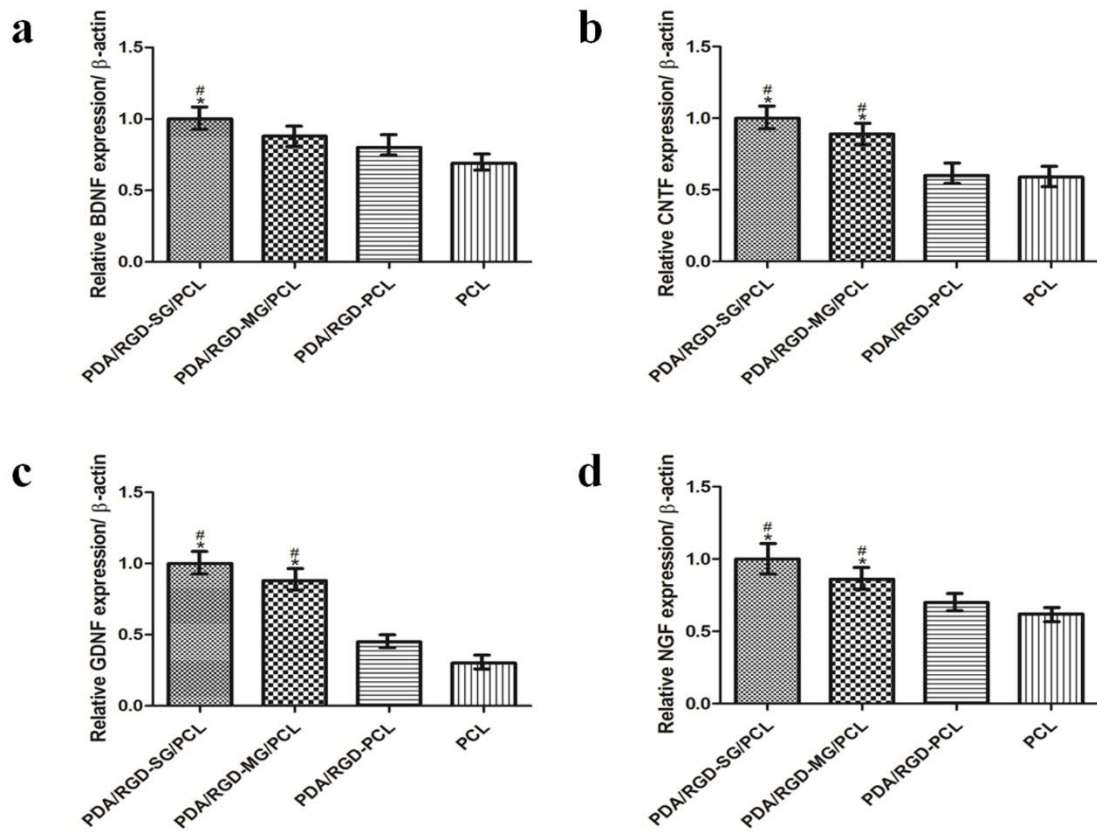

**Supplementary Figure 2. Quantitative PCR of BDNF, CNTF, GDNF, and NGF from SC on the different nanoscaffolds.** (a) Relative BDNF expression. (b) Relative CNTF expression. (c) Relative GDNF expression. (d) Relative NGF expression. All data are displayed as mean  $\pm$  standard deviation. \* $p < 0.05$  compared with PDA/RGD-PCL; # $p < 0.05$  compared with PCL (the statistical test is ANOVA).

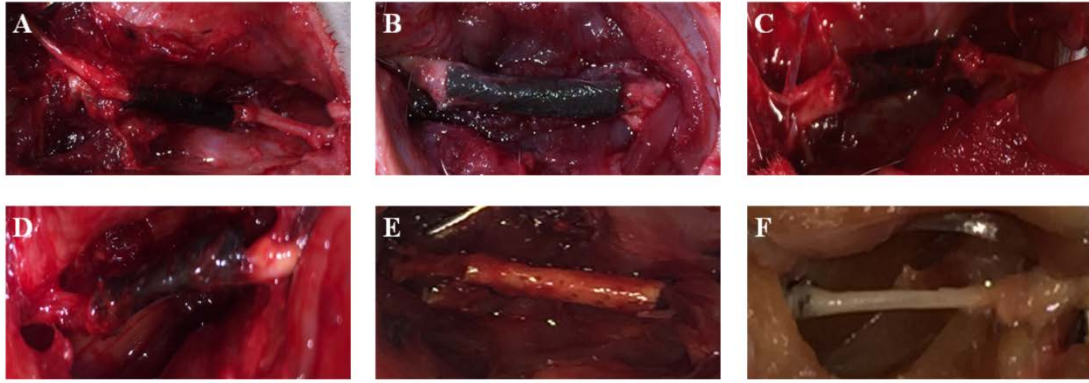

**Supplementary Figure 3. Regenerated nerves in different groups at 18 weeks after surgery.** SC loaded PDA/RGD-SG/PCL (A). SC loaded PDA/RGD-MG/PCL (B). PDA/RGD-SG/PCL (C). PDA/RGD-MG/PCL (D). PDA/RGD-PCL (E). Autograft (F).

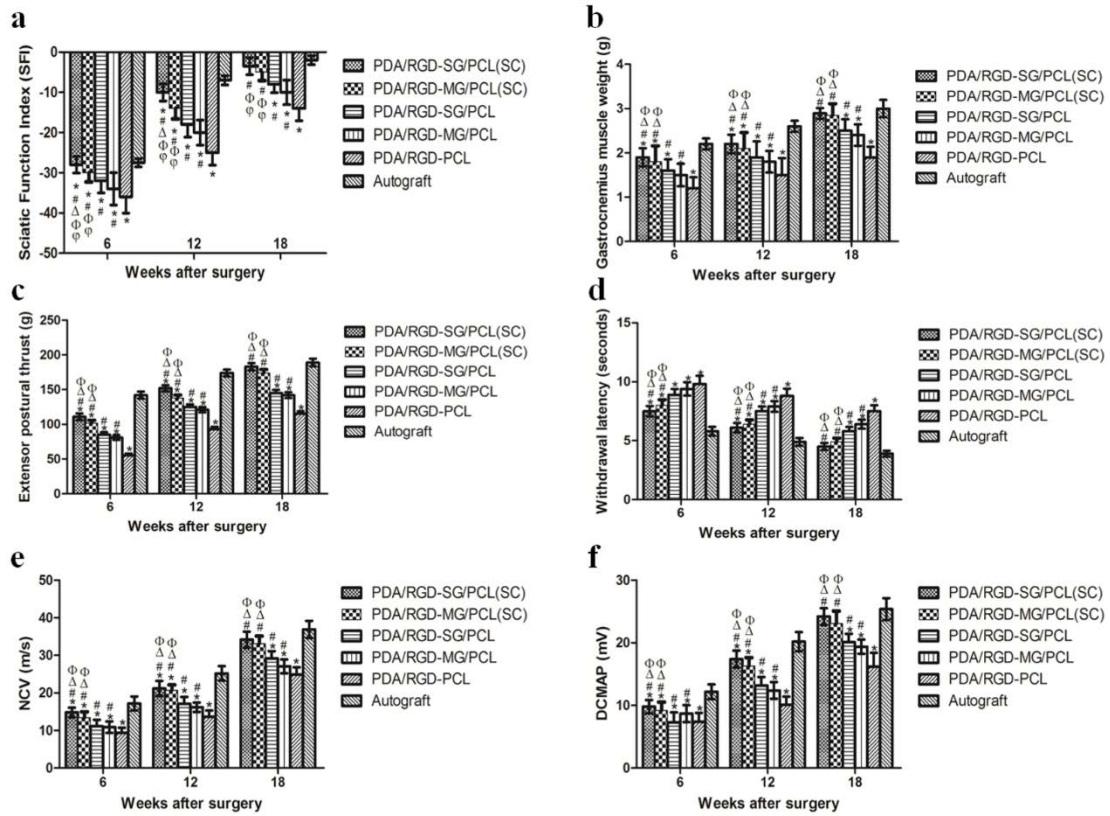

**Supplementary Figure 4. Functional and electrophysiological assessment of nerve regeneration.** (a) SFI. (b) Gastrocnemius muscle weight. (c) Extensor postural thrust. (d) Withdrawal latency. (e) NCV, (f) DCMAP. All data are displayed as mean  $\pm$  standard deviation. \* $p < 0.05$  compared with autograft ( $n = 5$ ); # $p < 0.05$  compared with PDA/RGD-PCL ( $n = 5$ ); ^ $p < 0.05$  compared with PDA/RGD-MG/PCL ( $n = 5$ );  $\phi p < 0.05$  compared with PDA/RGD-SG/PCL ( $n = 5$ ) (the statistical test is ANOVA).

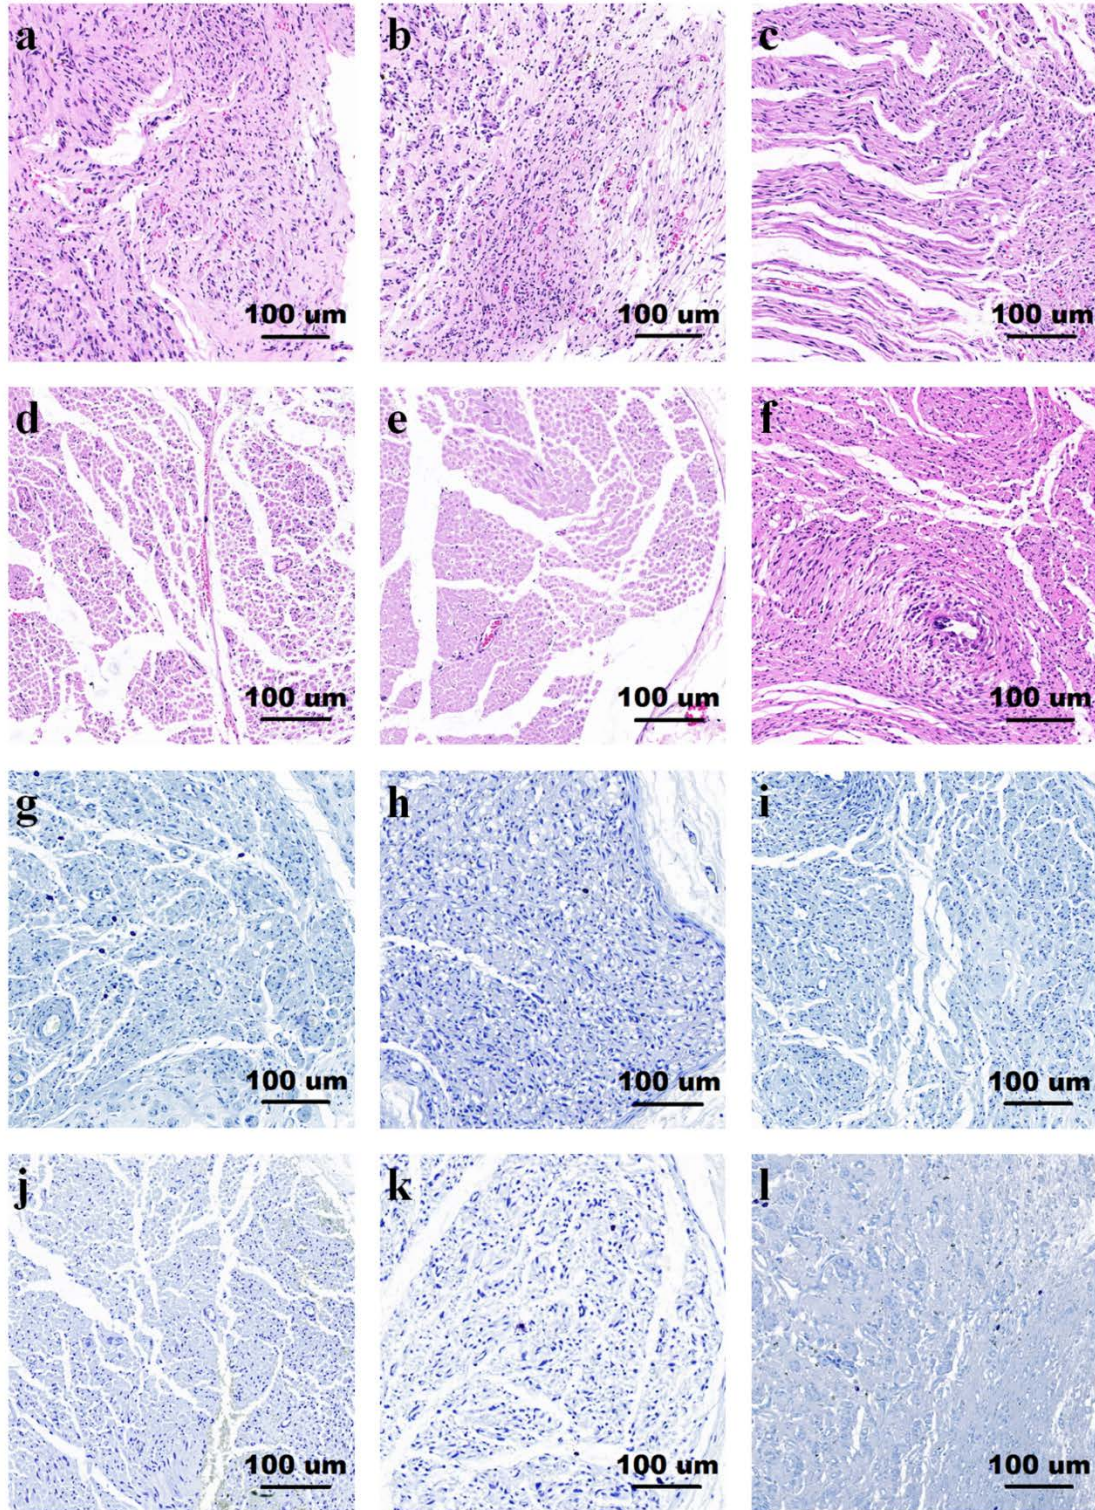

**Supplementary Figure 5.** (a-f) HE staining and (g-l) TB staining for regenerated nerves from different groups at 6 weeks postoperatively. (a,g) SC loaded PDA/RGD-SG/PCL. (b,h) SC loaded PDA/RGD-MG/PCL. (c,i) PDA/RGD-SG/PCL. (d,j) PDA/RGD-MG/PCL. (e,k) PDA/RGD-PCL. (f,l) Autograft. The scale bar is 100  $\mu\text{m}$ .

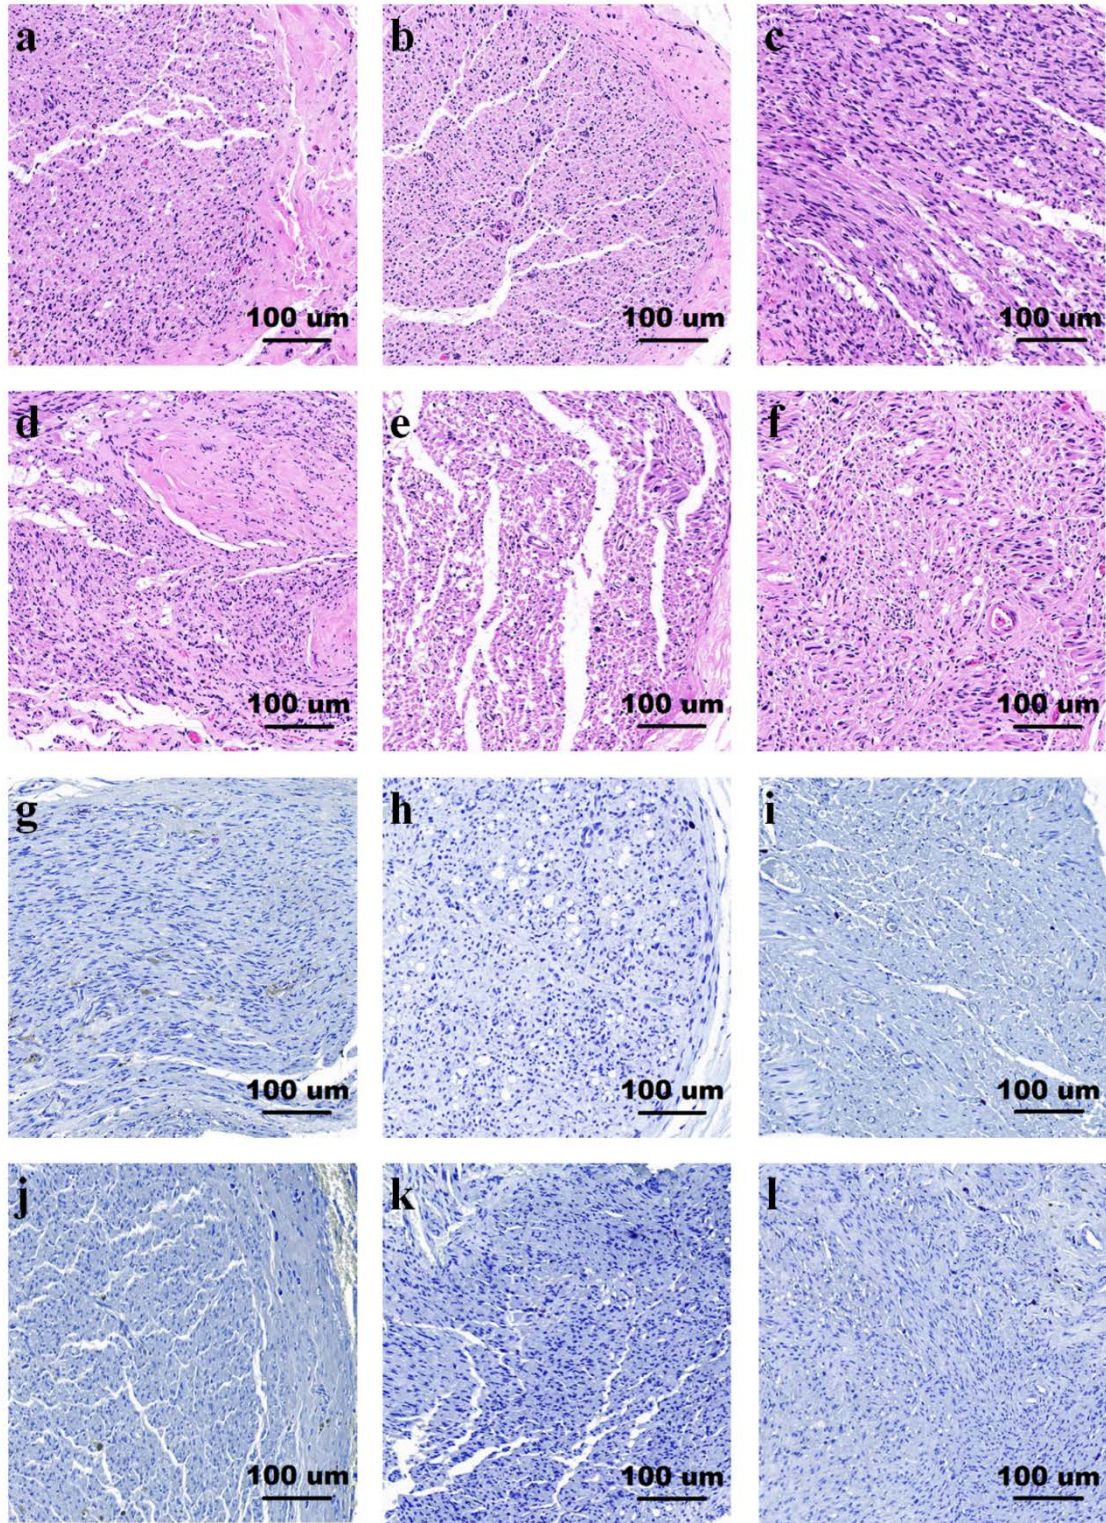

**Supplementary Figure 6.** (a-f) HE staining and (g-l) TB staining for regenerated nerves from different groups at 12 weeks postoperatively. (a,g) SC loaded PDA/RGD-SG/PCL. (b,h) SC loaded PDA/RGD-MG/PCL. (c,i) PDA/RGD-SG/PCL. (d,j) PDA/RGD-MG/PCL. (e,k) PDA/RGD-PCL. (f,l) Autograft. The scale bar is 100  $\mu\text{m}$ .

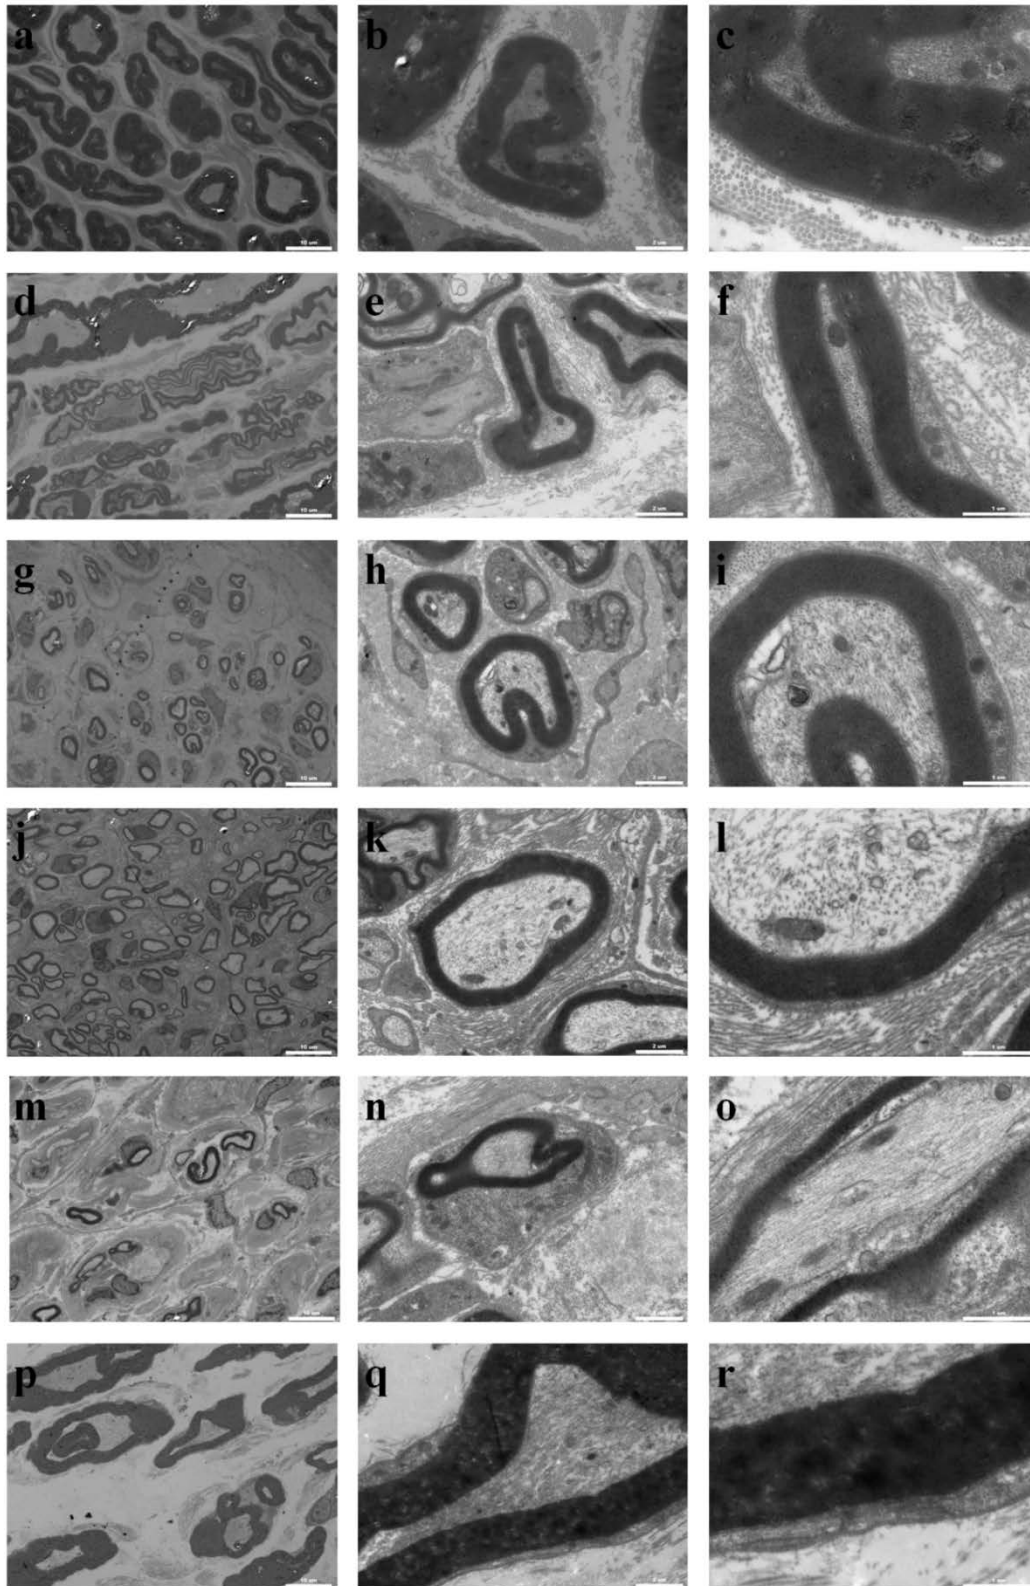

**Supplementary Figure 7. TEM for regenerated myelinated axons from different groups at 6 weeks postoperatively. (a-c) SC loaded PDA/RGD-SG/PCL. (d-f) SC loaded PDA/RGD-MG/PCL. (g-i) PDA/RGD-SG/PCL. (j-l) PDA/RGD-MG/PCL. (m-o) PDA/RGD-PCL. (p-r) Autograft. The scale bar in a, d, g, j, m and p is 10  $\mu\text{m}$ . The scale bar in b, e, h, k, n and q is 2  $\mu\text{m}$ . The scale bar in c, f, i, l, o and r is 1  $\mu\text{m}$ .**

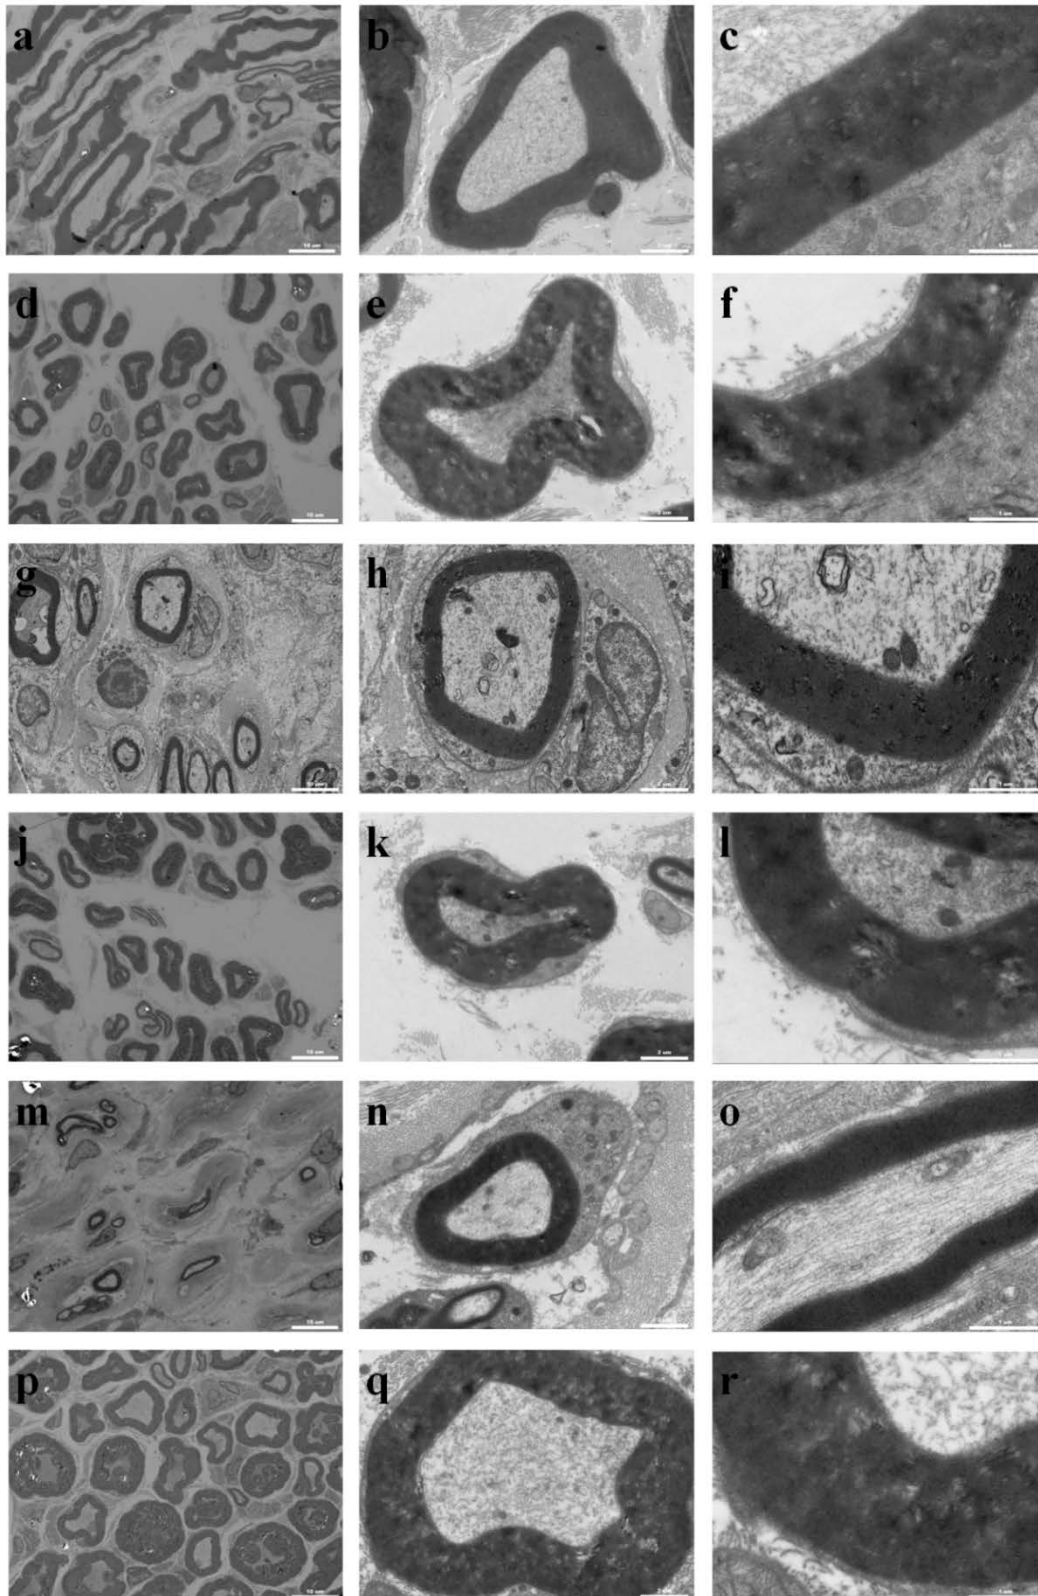

**Supplementary Figure 8. TEM for regenerated myelinated axons from different groups at 12 weeks postoperatively. (a-c) SC loaded PDA/RGD-SG/PCL. (d-f) SC loaded PDA/RGD-MG/PCL. (g-i) PDA/RGD-SG/PCL. (j-l) PDA/RGD-MG/PCL. (m-o) PDA/RGD-PCL. (p-r) Autograft. The scale bar in a, d, g, j, m and p is 10  $\mu\text{m}$ . The scale bar in b, e, h, k, n and q is 2  $\mu\text{m}$ . The scale bar in c, f, i, l, o and r is 1  $\mu\text{m}$ .**



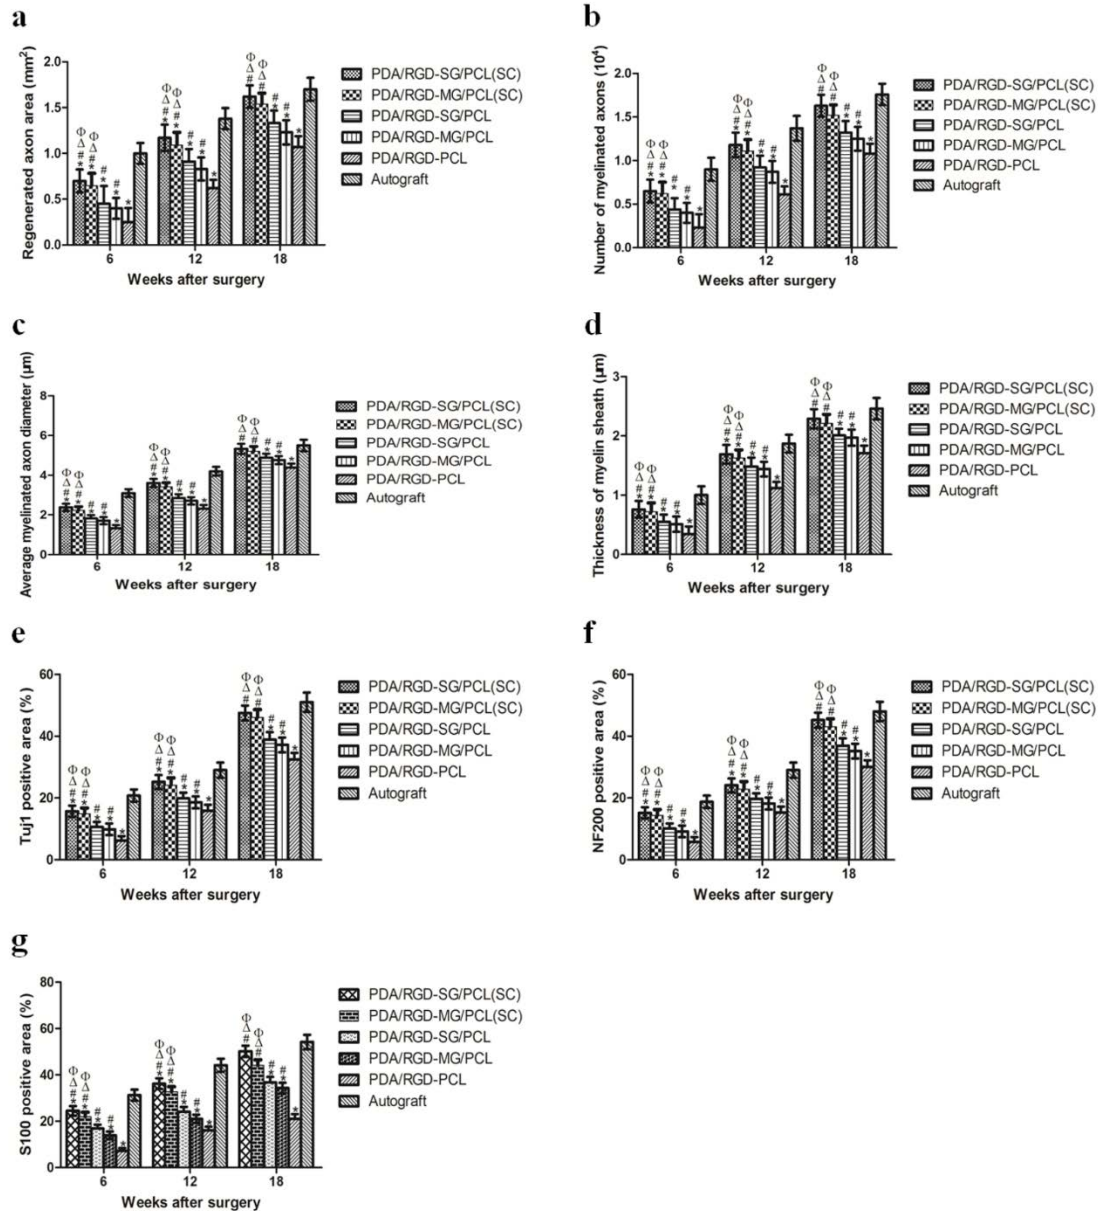

**Supplementary Figure 9. Morphological evaluation of nerve regeneration.** (a) Regenerated axon area. (b) Number of myelinated axons, (c) Average myelinated axon diameter. (d) Thickness of myelin sheath. (e) Tuj1 positive area (%). (f) NF200 positive area (%). (g) S100 positive area (%). All data are displayed as mean  $\pm$  standard deviation. \* $p < 0.05$  compared with autograft; # $p < 0.05$  compared with PDA/RGD-PCL (n=5); ^ $p < 0.05$  compared with PDA/RGD-MG/PCL (n=5);  $\phi p < 0.05$  compared with PDA/RGD-SG/PCL (n=5) (the statistical test is ANOVA).

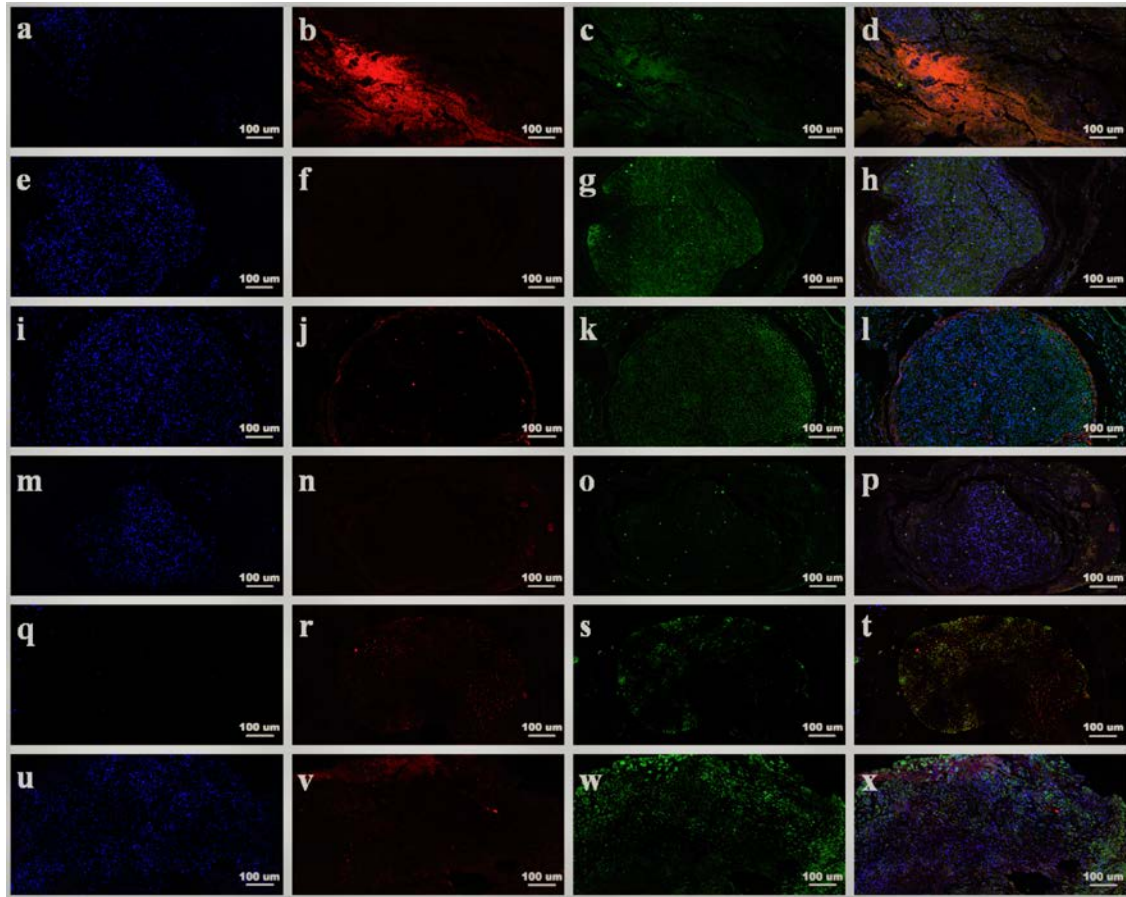

**Supplementary Figure 10. Triple immunofluorescent staining of Tuj1 and NF200 of regenerated nerves at 6 weeks postoperatively.** Tuj1 (green), NF200 (red) and nuclei (blue) were exhibited from different groups respectively. **(a-d)** SC loaded PDA/RGD-SG/PCL. **(e-h)** SC loaded PDA/RGD-MG/PCL. **(i-l)** PDA/RGD-SG/PCL. **(m-p)** PDA/RGD-MG/PCL. **(q-t)** PDA/RGD-PCL. **(u-x)** Autograft. The scale bar is 100  $\mu\text{m}$ .

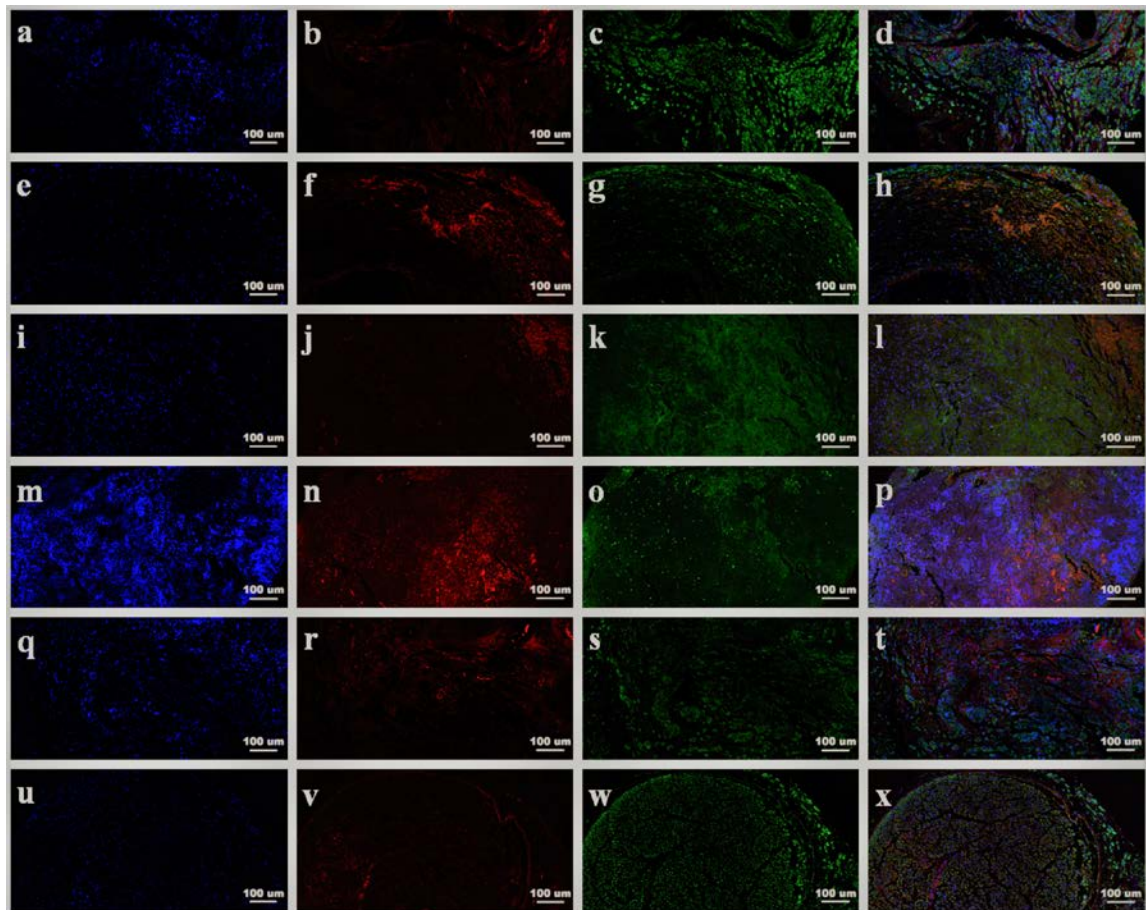

**Supplementary Figure 11. Triple immunofluorescent staining of Tuj1 and NF200 of regenerated nerves at 12 weeks postoperatively.** Tuj1 (green), NF200 (red) and nuclei (blue) were exhibited from different groups respectively. **(a-d)** SC loaded PDA/RGD-SG/PCL. **(e-h)** SC loaded PDA/RGD-MG/PCL. **(i-l)** PDA/RGD-SG/PCL. **(m-p)** PDA/RGD-MG/PCL. **(q-t)** PDA/RGD-PCL. **(u-x)** Autograft. The scale bar is 100  $\mu\text{m}$ .

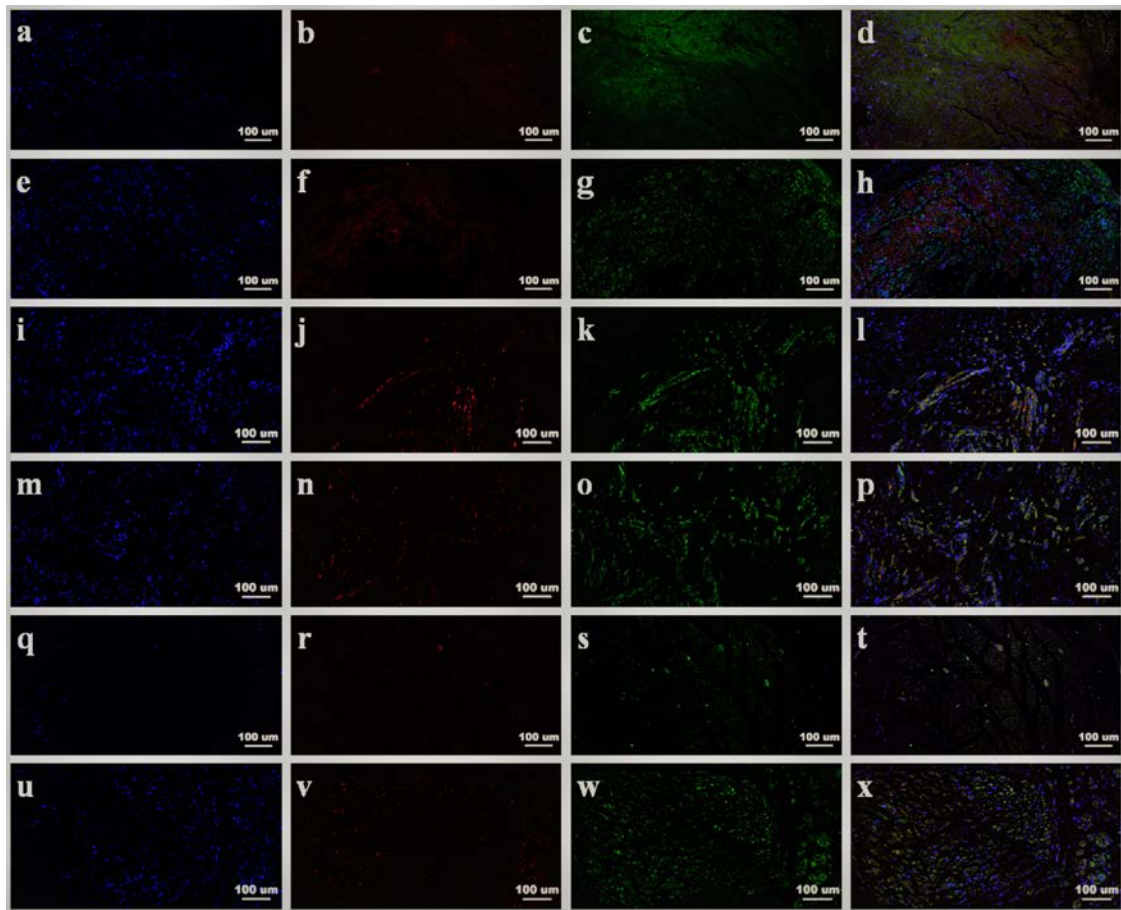

**Supplementary Figure 12. Triple immunofluorescent staining of S100 and MBP of regenerated nerves at 6 weeks postoperatively.** S100 (green), MBP (red) and nuclei (blue) were exhibited from different groups respectively. (a-d) SC loaded PDA/RGD-SG/PCL. (e-h) SC loaded PDA/RGD-MG/PCL. (i-l) PDA/RGD-SG/PCL. (m-p) PDA/RGD-MG/PCL. (q-t) PDA/RGD-PCL. (u-x) Autograft. The scale bar is 100  $\mu$ m.

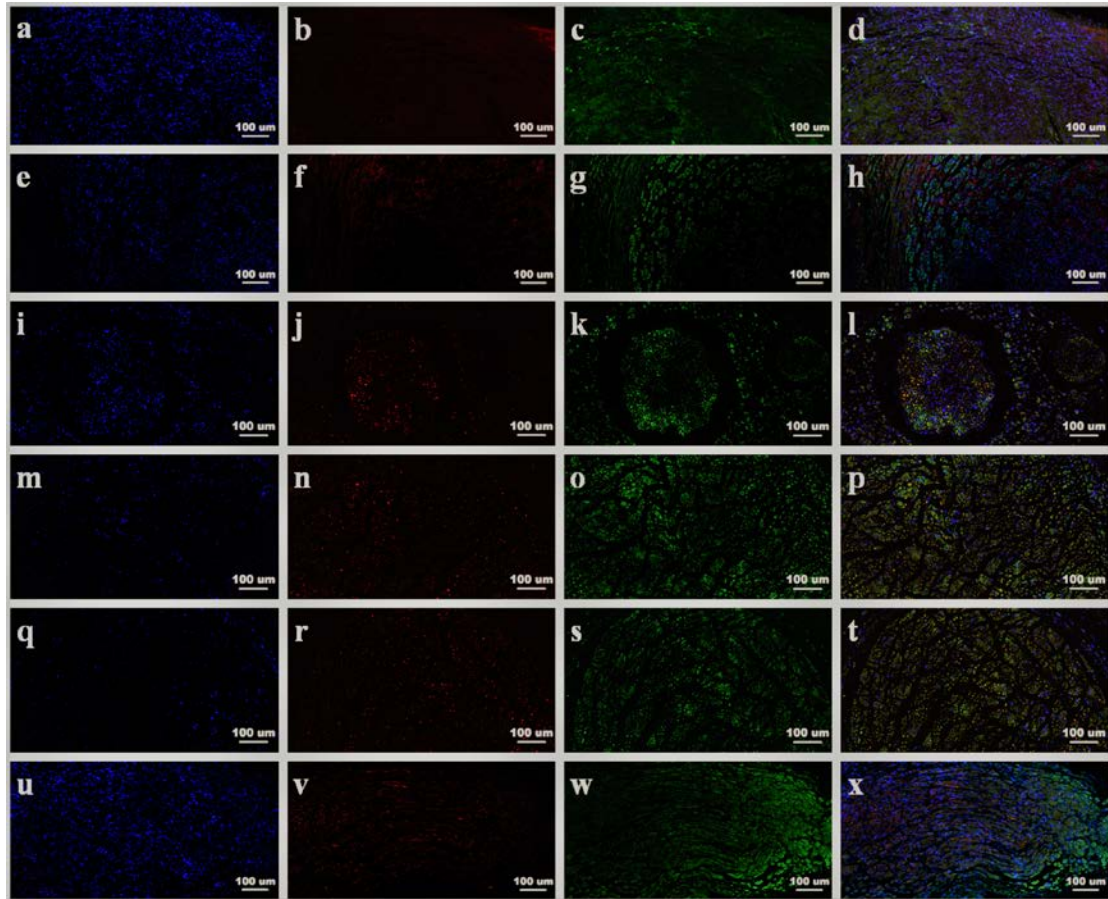

**Supplementary Figure 13. Triple immunofluorescent staining of S100 and MBP of regenerated nerves at 12 weeks postoperatively.** S100 (green), MBP (red) and nuclei (blue) were exhibited from different groups respectively. **(a-d)** SC loaded PDA/RGD-SG/PCL. **(e-h)** SC loaded PDA/RGD-MG/PCL. **(i-l)** PDA/RGD-SG/PCL. **(m-p)** PDA/RGD-MG/PCL. **(q-t)** PDA/RGD-PCL. **(u-x)** Autograft. The scale bar is 100  $\mu\text{m}$ .

# Certificate of Analysis

## 分析报告

---

|                       |                              |
|-----------------------|------------------------------|
| <b>Product Name</b>   | <b>Single layer graphene</b> |
| <b>Product number</b> | <b>HQNANO-GR-001</b>         |
| <b>Batch number</b>   | <b>02141115A</b>             |

### 检测实验/TEST

### 要求和结果/SPECIFICATION

|             |               |
|-------------|---------------|
| Purity      | >98wt%        |
| Single rate | >97wt%        |
| Thickness   | 0.5-3.0nm     |
| Diameter    | 0.5-5 $\mu$ m |
| Layers      | 1-2           |

**Supplementary Figure 14. Characteristics of single-layered graphene.** The data were obtained from the product description provided by Suzhou Tanfeng Graphene Technology CO., Ltd (China). We displayed the purity, single rate, thickness, diameter, and layers of single-layered graphene.

Multi-layered graphene  
Purity 多层石墨烯 纯度: >95%  
Thickness 厚度: 3.4-8nm  
Area 片层大小: 5-50  $\mu\text{m}$   
Specific area 比表面积: 100-300m<sup>2</sup>/g  
Color 外观: 黑色粉末 Black

**Supplementary Figure 15. Characteristics of multi-layered graphene.** The data were obtained from the product description provided by Suzhou Tanfeng Graphene Technology CO., Ltd (China). We displayed the purity, thickness, area, specific area and color of multi-layered graphene.

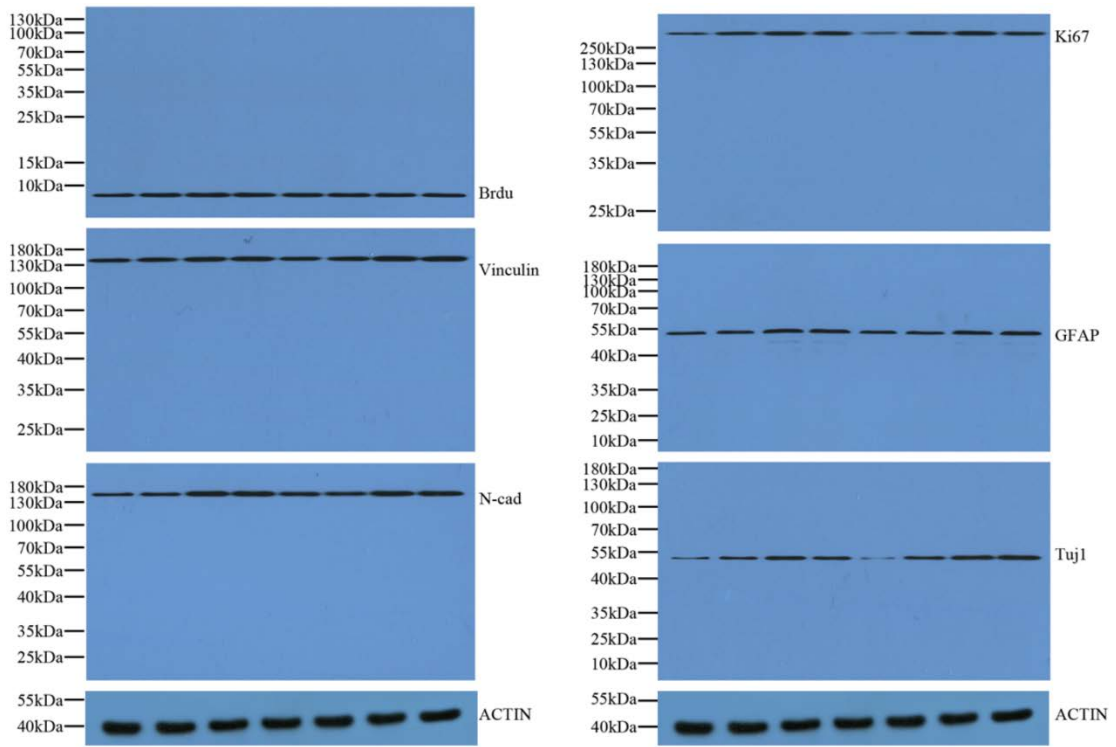

**Supplementary Figure 16. Uncropped scans of Western blots (from Fig. 4).**
